# Supplementary material for: Selenium Nanomaterials Enhance the Nutrients and Functional Components of Fuding Dabai Tea
Source: MDPI journal article supplement (doi:10.3390/nano14080681), 2024-04-15
Supplement: s1 [file s1]

# **Selenium Nanomaterials Enhance the Nutrients and Functional Components of**

## **Fuding Dabai Tea**

Xiaoli Zhang<sup>ab</sup>, Xiaona Li<sup>ab</sup>, Feiran Chen<sup>ab</sup>, Xuesong Cao<sup>ab</sup>, Chuanxi Wang<sup>ab</sup>, Liya Jiao<sup>ab</sup>, Le Yue<sup>ab\*</sup>, Zhenyu Wang<sup>ab</sup>

*<sup>a</sup> Institute of Environmental Processes and Pollution Control, School of Environment and Ecology, Jiangnan University, Wuxi 214122, China.*

*<sup>b</sup> Jiangsu Engineering Laboratory for Biomass Energy and Carbon Reduction Technology, Wuxi 214122, China.*

\*Corresponding author:

*Tel.: +86 0510 85911911*

*E-mail address: leyue@jiangnan.edu.cn (Dr. Le Yue)*

**Text S1** *HPLC-MS/MS operating parameters used in this study*

The components of theanine, catechins and alkaloids were detected by the high-performance liquid chromatography-tandem mass spectrometry (HPLC-MS/MS, Thermo Scientific, Germany). The fresh tea buds were ground into a powder. Then, samples were separated at 35 °C on a Thermo Scientific UPLC Vanquish equipped with a HSS T3 column applying the following gradient at a flow rate of 0.35  $\mu\text{L}/\text{min}$ . The eluents in negative/positive mode were eluent A (0.01% v/v formic acid in water) and eluent B (0.01% formic acid in acetonitrile). The solvent gradient was set as follows: 5 % B, 0 min; 5 % B, 1 min; 95 % B, 11.0 min; 95 % B, 12min; 5% B, 12.1min; 5 % B, 14 min. The following dd-MS<sup>2</sup> product ion spectra were collected at resolution of 17500, isolation window of 3.0 m/z, and collision energy of nce: 15, 30, 40, respectively.

The metabolites in tea buds also were determined by HPLC-MS/MS. After the plant sample extraction, 10  $\mu\text{L}$  samples were injected onto a Acquity HPLC HSS T3 (2.1 $\times$ 100 mm, 1.8  $\mu\text{m}$ ) using an 18-min linear gradient at a flow rate of 0.35  $\text{mL}\cdot\text{min}^{-1}$ . The eluents in negative/positive mode were eluent A (0.1% v/v formic acid in water) and eluent B (0.1% formic acid in acetonitrile). The solvent gradient was set as follows: 5% B, 0 min; 5% B, 1.5 min; 100% B, 10.0 min; 100% B, 11 min; 100% B, 11.5min; 5% B, 14 min. Nitrogen was used as sheath gas (35  $\text{L}\cdot\text{min}^{-1}$ ) and aux gas (15  $\text{L}\cdot\text{min}^{-1}$ ). The spray voltage was set as 3 kV (-3 kV for negative mode and 3 kV for positive mode) and capillary temperature was 320 °C. The resolution of full MS was set as 70000 and scan range was acquired between 70 to 1050 m/z in full MS-dd MS<sup>2</sup> mode. The following dd-MS<sup>2</sup> product ion spectra were collected at resolution of 17500, isolation

window of 1.5 m/z, and collision energy of nce: 20, 40, 60. The raw data files were processed using Compound Discoverer 3.1 software coupled with the mzCloud and S-7 Chem Spider libraries.

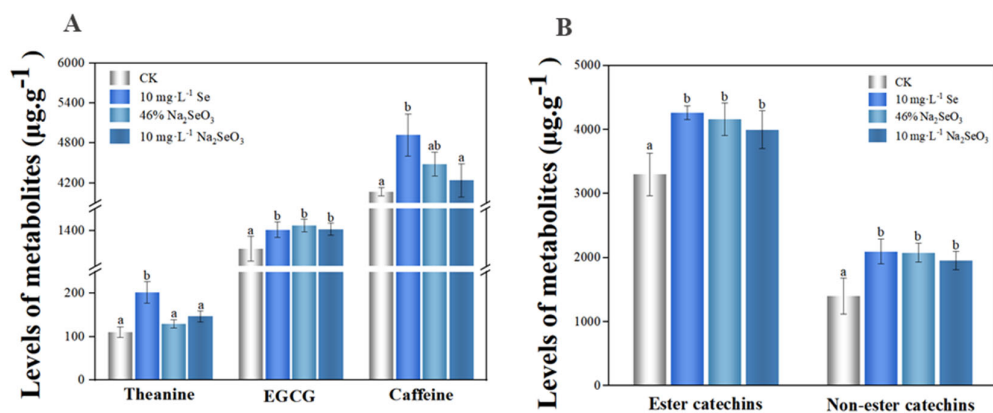

**Figure S1.** Changes in the content of (A) theanine, EGCG, caffeine and (B) esters, and non-ester catechins in FDDB treated with Se NMs and their equivalent ion control and fertilizer control. Letters following numbers indicate statistical significance - samples without common letters are significantly different at  $p < 0.05$  according to Duncan and Toucan tests.

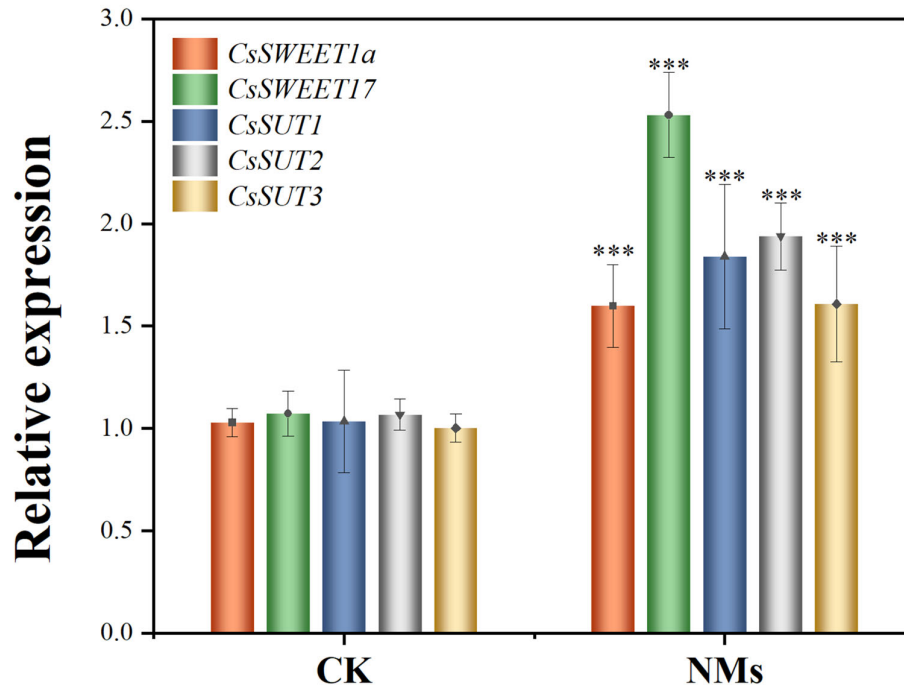

**Figure S2.** Relative expression of *CsSUT* and *CsSWEET* treated with Se NMs. The significant differences are marked with “\*\*\*” ( $p < 0.001$ ). The value represents the mean  $\pm$  standard error ( $n = 5$ ).

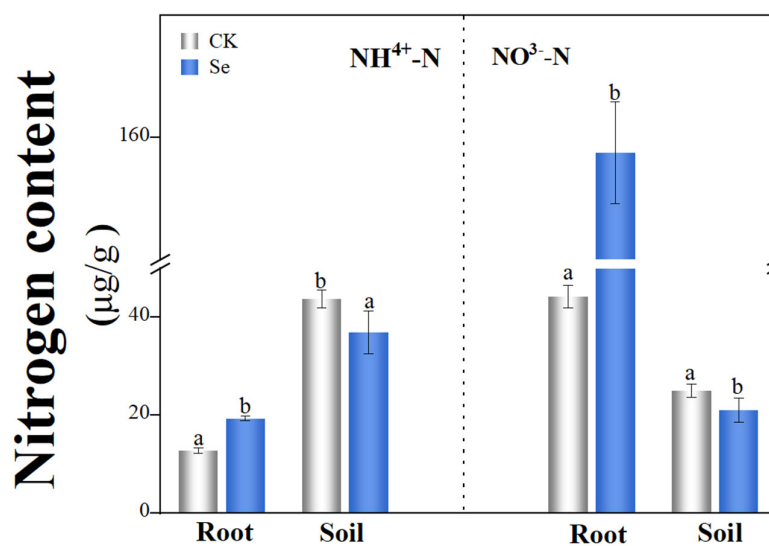

**Figure S3.** The content of ammonium and nitrate nitrogen in tea roots and rhizosphere soil under treatment with Se NMs. There was a significant difference between the treatment groups with different numbers ( $p < 0.05$ ), the value represents the mean  $\pm$  standard error ( $n = 5$ ).

**Table S1** Hydrodynamic diameter and Zeta potential of Se NMs.

| Name                  | Value           | Unit |
|-----------------------|-----------------|------|
| Hydrodynamic diameter | 156.8 $\pm$ 9.9 | nm   |
| Zeta potential        | -24.0 $\pm$ 1.6 | mV   |

**Table S2** *Primer sequences of several genes related to metabolism and synthesis in tea*

| <b>Gene name</b> | <b>Forward Primer</b>    | <b>Reverse Primer</b>    |
|------------------|--------------------------|--------------------------|
| <i>GAPDH</i>     | TTGGCATCGTTGAGGGTCT      | CAGTGGAACACGGAAAGC       |
| <i>CsTs1</i>     | TCTTTCTGGACCTGTGAGTG     | GCTTGAGGGTAGATAATGAGT    |
| <i>CsGs1</i>     | TAAAGTGCAACCGTCCCCTC     | GTCCAAGCCAGTACCACCAA     |
| <i>CsGOGAT</i>   | CGAGGATCTTGCCCAACTGA     | ACCCAGAAGCAACAGTACC      |
| <i>CsPAL</i>     | GAATGCCGGTCTTATCCACT     | CGGTGAACACCTTGTCAAAC     |
| <i>CsC4H</i>     | CGAGAGGTTCTTGGAAGAGG     | AGAATTGGCAGAGCAAGGAT     |
| <i>CsCHI</i>     | CACAAAGAAGATTATGGGTGAAG  | CAAACCTAGAAGTTGCCAAGAGT  |
| <i>CsANR</i>     | GAATGCCGGTCTTATCCACT     | CGGTGAACACCTTGTCAAAC     |
| <i>CsLAR</i>     | GAATGCCGGTCTTATCCACT     | CGGTGAACACCTTGTCAAAC     |
| <i>UGGT</i>      | GGCAAGAAGCTAATAGGGTCGTT  | TTGTATCATTTCGGAAGTGGTGGG |
| <i>CsDFR</i>     | GTATTTGGACCGATGTGG       | TTGTACTCCGGGTATTTT       |
| <i>CsANS</i>     | GGCCACAAGTGCCTACAATTG    | CCCATGATTCACCAAATGCA     |
| <i>CsAPP1</i>    | GCTCAGTTGGGTGTTGGGTGGTTG | CGGCGAGGAGTGGAAGTGAA     |
| <i>CsAPP2</i>    | GCAGTGATTGGGTCAGGAGTGT   | GCAGCGAGGAGAGTAGAAGTGT   |
| <i>CsAPP5</i>    | CTCTGTGGCTGCATGGGCTATG   | TGGATGACTAGGCGGCATTGG    |
| <i>CsAPP6</i>    | TTGCGGTTGTCTTGGCTATGCT   | CGGCTCTCTGCGAATGCGAATA   |
| <i>CsAPP8</i>    | CGGCACGGAATGGCTCTCAAT    | TGGAGAACGGATAGGCGAAAGC   |
| <i>CsSWEET1a</i> | AGCCAAGAAACCTCCTAATACC   | TACTTGCTCGATCGCTTCTCTT   |
| <i>CsSWEET17</i> | GGTTTCTCGGCAATACAGCATC   | GGTGATCCTTGGTGCTTCCATT   |
| <i>CsSUT1</i>    | CATGCGATGCTAACTGTGCC     | TTCAGCATGGCTCGACTGTT     |
| <i>CsSUT2</i>    | GGAATCGACTCCGATCTGCC     | TGCAAAGCCCAACCGAATT      |
| <i>CsSUT3</i>    | TGTGGTCGGAGCTATTGCAG     | CAGTGAGAAGGGGCAGAAGG     |
